# Supplementary material for: Expression of colorectal neoplasia differentially expressed in anaplastic thyroid carcinoma and its effect on cancer cell proliferation
Source: PubMed Central journal article supplement — Ann Transl Med. 2022 Apr;10(8):473. doi: 10.21037/atm-22-945 (PMC9096416; doi:10.21037/atm-22-945), 2022-04
Supplement: atm-10-08-473-supplementary.pdf [file atm-10-08-473-supplementary.pdf]

**Table S1** Clinical characteristics of thyroid cancer patients from TCGA

| Variables                |                                                 | Patients (N=502)    |       |
|--------------------------|-------------------------------------------------|---------------------|-------|
|                          |                                                 | n                   | %     |
| Age                      | years (mean, range)                             | 47.34 (15.00-89.00) | /     |
| Overall survival times   | days (mean, range)                              | 1209.7 (0-5423.0)   | /     |
| Overall survival status  | Alive                                           | 486                 | 96.81 |
|                          | Dead                                            | 16                  | 3.19  |
| Gender                   | Female                                          | 367                 | 73.11 |
|                          | Male                                            | 135                 | 26.89 |
| Race                     | White                                           | 332                 | 66.13 |
|                          | Others                                          | 79                  | 15.74 |
|                          | Unknown                                         | 91                  | 18.13 |
| Thyroid disorder history | Lymphocytic thyroiditis                         | 47                  | 9.36  |
|                          | Nodular hyperplasia                             | 68                  | 13.55 |
|                          | Lymphocytic thyroiditis and nodular hyperplasia | 24                  | 4.78  |
|                          | Normal                                          | 280                 | 55.78 |
|                          | Others                                          | 25                  | 4.98  |
|                          | Unknown                                         | 58                  | 11.55 |
| PTC subtype              | Classical                                       | 356                 | 70.92 |
|                          | Follicular                                      | 101                 | 20.12 |
|                          | Tall Cell                                       | 36                  | 7.17  |
|                          | Others                                          | 9                   | 1.79  |
| Location                 | Bilateral                                       | 86                  | 17.13 |
|                          | Isthmus                                         | 22                  | 4.38  |
|                          | Left lobe                                       | 175                 | 34.86 |
|                          | Right lobe                                      | 213                 | 42.43 |
|                          | Unknown                                         | 6                   | 1.20  |
| Residual tumor           | R0                                              | 384                 | 76.49 |
|                          | R1                                              | 52                  | 10.36 |
|                          | R2                                              | 4                   | 0.80  |
|                          | RX                                              | 30                  | 5.98  |
|                          | Unknown                                         | 32                  | 6.37  |
| Tumor stage              | Stage I                                         | 281                 | 55.98 |
|                          | Stage II                                        | 52                  | 10.36 |
|                          | Stage III                                       | 112                 | 22.31 |
|                          | Stage IV                                        | 55                  | 10.96 |
|                          | Unknown                                         | 2                   | 0.40  |
| T stage                  | T1                                              | 143                 | 28.49 |
|                          | T2                                              | 164                 | 32.67 |
|                          | T3                                              | 170                 | 33.86 |
|                          | T4                                              | 23                  | 4.58  |
|                          | TX                                              | 2                   | 0.40  |
| N stage                  | N0                                              | 229                 | 45.62 |
|                          | N1                                              | 223                 | 44.42 |
|                          | NX                                              | 50                  | 9.96  |
| M stage                  | M0                                              | 282                 | 56.18 |
|                          | M1                                              | 9                   | 1.79  |
|                          | MX                                              | 210                 | 41.83 |
|                          | Unknown                                         | 1                   | 0.20  |

TCGA, The Cancer Genome Atlas.

**Table S2** The correlation between CRNDE and genes in the WNT signaling pathway

| LncRNA | mRNA     | P value  | Cor  | Slope |
|--------|----------|----------|------|-------|
| CRNDE  | FZD2     | 1.17E-11 | 0.30 | 0.23  |
| CRNDE  | FOSL1    | 1.29E-09 | 0.27 | 0.35  |
| CRNDE  | TCF7L1   | 1.32E-08 | 0.25 | 0.28  |
| CRNDE  | NFATC1   | 1.71E-08 | 0.25 | 0.16  |
| CRNDE  | CSNK1E   | 2.93E-07 | 0.23 | 0.09  |
| CRNDE  | WNT2B    | 6.76E-07 | 0.22 | 0.09  |
| CRNDE  | WNT5B    | 2.07E-06 | 0.21 | 0.18  |
| CRNDE  | VANGL1   | 2.44E-06 | 0.21 | 0.12  |
| CRNDE  | PPP2R5B  | 3.36E-06 | 0.21 | 0.08  |
| CRNDE  | FZD10    | 1.27E-05 | 0.19 | 0.12  |
| CRNDE  | PRICKLE2 | 1.28E-05 | 0.19 | 0.12  |
| CRNDE  | RAC3     | 2.15E-05 | 0.19 | 0.14  |
| CRNDE  | SOX17    | 7.09E-05 | 0.18 | 0.13  |
| CRNDE  | LEF1     | 1.12E-04 | 0.17 | 0.16  |
| CRNDE  | PLCB3    | 1.22E-04 | 0.17 | 0.05  |
| CRNDE  | PPP2R1B  | 1.22E-04 | 0.17 | 0.06  |
| CRNDE  | ROCK2    | 1.29E-04 | 0.17 | 0.08  |
| CRNDE  | PLCB1    | 1.98E-04 | 0.17 | 0.09  |
| CRNDE  | FZD7     | 3.19E-04 | 0.16 | 0.12  |
| CRNDE  | WIF1     | 3.23E-04 | 0.16 | 0.16  |
| CRNDE  | SMAD3    | 5.49E-04 | 0.15 | 0.08  |
| CRNDE  | WNT9A    | 1.28E-03 | 0.14 | 0.09  |
| CRNDE  | RUVBL1   | 1.38E-03 | 0.14 | 0.03  |
| CRNDE  | WNT7B    | 1.98E-03 | 0.14 | 0.11  |
| CRNDE  | TP53     | 1.99E-03 | 0.14 | 0.05  |
| CRNDE  | PRICKLE1 | 2.27E-03 | 0.14 | 0.14  |
| CRNDE  | RBX1     | 2.95E-03 | 0.13 | 0.05  |
| CRNDE  | NKD1     | 3.22E-03 | 0.13 | 0.06  |
| CRNDE  | WNT11    | 4.26E-03 | 0.13 | 0.14  |
| CRNDE  | TCF7L2   | 4.28E-03 | 0.13 | 0.06  |
| CRNDE  | RAC1     | 4.98E-03 | 0.13 | 0.02  |
| CRNDE  | CCND1    | 5.17E-03 | 0.12 | 0.09  |
| CRNDE  | SFRP5    | 5.75E-03 | 0.12 | 0.06  |
| CRNDE  | SFRP4    | 6.17E-03 | 0.12 | 0.25  |
| CRNDE  | JUN      | 6.79E-03 | 0.12 | 0.13  |
| CRNDE  | PLCB4    | 6.97E-03 | 0.12 | 0.13  |
| CRNDE  | WNT4     | 9.78E-03 | 0.12 | 0.16  |
| CRNDE  | PORCN    | 1.15E-02 | 0.11 | 0.07  |
| CRNDE  | WNT3A    | 1.25E-02 | 0.11 | 0.06  |
| CRNDE  | DKK2     | 1.31E-02 | 0.11 | 0.09  |
| CRNDE  | WNT6     | 1.51E-02 | 0.11 | 0.05  |
| CRNDE  | FRAT1    | 1.60E-02 | 0.11 | 0.04  |
| CRNDE  | SFRP2    | 1.91E-02 | 0.10 | 0.30  |
| CRNDE  | FZD6     | 2.15E-02 | 0.10 | 0.07  |
| CRNDE  | FZD8     | 2.26E-02 | 0.10 | 0.08  |
| CRNDE  | WNT16    | 3.00E-02 | 0.10 | 0.04  |
| CRNDE  | FZD4     | 3.86E-02 | 0.09 | 0.06  |

CRNDE, colorectal neoplasia differentially expressed; LncRNA, long-noncoding RNA; WNT, wnt signaling pathway.
